# Supplementary material
Source: HighWire-hosted journal article supplement (https://bmjopen.bmj.com/content/8/1/e018201)
Supplement: inline-supplementary-material-1 [file inline-supplementary-material-1.pdf]

## APPENDIX I: Consent to Participate in Health-E You Study

Welcome to Health-E You! Health-E You is part of a research study to understand and improve the health of teen girls. *It is completely confidential.* Teens who qualify for the study can earn up to \$70 for completing 4 short surveys: this survey today, one after today's visit and one at 3 and 6 months from today. Each survey takes about 10 minutes. Participation in this study is voluntary. If you choose not to participate, there is no penalty and you will still receive care the way you usually do.

What is this study?

Kathleen Tebb, PhD and other research staff from the University of California San Francisco, are conducting this study to better understand and improve the sexual health of teen girls.

What will happen if I qualify and take part in this research study?

Complete a brief questionnaire using this App before your visit with your medical provider (about 5 minutes) and another survey after your visit. You will receive a link to complete it either online or by phone. Complete two more surveys at 3 and 6 months after your visit. Each survey will take about 10 minutes to complete.

You can earn \$70 for completing the study. You will get a \$10 gift card after using this app and completing the follow-up survey within 24 hours of your visit. You will get another \$20 gift card for completing a survey in 3 months and \$20 for completing the last survey in 6 months. If you complete all of these surveys, you will get a \$20 bonus gift card.

There are no foreseen risks/discomforts in taking part in this study. Some questions may make you feel uncomfortable. You do not have to answer any question you don't want to and you can stop the study at any point. There is a small risk that your name and contact information, which will be used only to schedule follow-up surveys could be lost. We will do our best to make sure that the personal information gathered for this study is kept private. Names and contact information will be kept in a secured database that only the researchers have access to. If you have questions, now or later? You can call Dr. Tebb at 415-514-1754. You may also call the office of the UCSF Committee on Human Research (who reviews the research to protect your rights) at 415-476-1814.

- ☐ I want to participate in this study, let's see if I qualify
- ☐ I do not want to participate in this study
